# Supplementary material for: LocText: relation extraction of protein localizations to assist database curation
Source: PubMed Central journal article supplement (PMC5773052; doi:10.1186/s12859-018-2021-9), 2018-01-17

# Supporting online material for:

## ***LocText*: relation extraction of protein localizations to assist database curation**

Juan Miguel Cejuela, Shrikant Vinchurkar, Tatyana Goldberg, Madhukar Sollepura Prabhu Shankar, Ashish Baghudana, Aleksandar Bojchevski, Carsten Uhlig, André Ofner, Pandu Raharja-Liu, Lars Juhl Jensen, and Burkhard Rost

### **1. Short description of Supporting Online Material**

Some results not shown in main paper but supporting some described findings.

### **2. Material**

(starts in next page; one Table/Figure per page)

**Fig. S1. Parse Tree Features.** *LocText* derives features from parsed syntax trees: dependencies between tokens (e.g. "to" prepositions "the trans-Golgi network"), noun phrases (e.g. the AP-1  $\mu$  adaptin subunit"), part of speech tags (e.g. "localized" is a verb, past participle), linear distance between tokens (e.g. "adaptin" and "Golgi" are 10-tokens away from each other), or dependency distances between tokens (e.g. "adapting" and "Golgi" are 4-dependencies away).

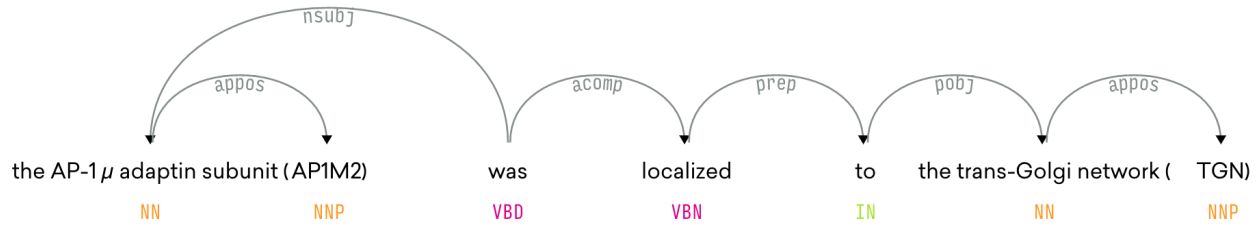

**Table S1. Sample features after L1 regularization selection.**

| <b>Feature name</b>                       | <b>Explanation</b>                                                                                                                                                                                                             |
|-------------------------------------------|--------------------------------------------------------------------------------------------------------------------------------------------------------------------------------------------------------------------------------|
| Total count of entities                   | Float (scaled [0, 1]), count of entities (proteins + localizations + organisms) in sentence-based instance.                                                                                                                    |
| Is Protein Marker                         | (Binary) test whether the marked protein text was equal to a list of manually defined protein markers: GFP, CYH2, ALG2, MSB2, KSS1, KRE11, SER2.                                                                               |
| <i>PROTEIN</i> localize                   | Binary, Linear Dependency (LD) feature. Test if the sentence-based instance contains two consecutive tokens (2-gram), where the first token is part of a protein name and the following has lemma “localize” (e.g. localized). |
| <i>SOURCE</i> localization at             | Binary, LD. Test if the first entity (source) in the sentence-based instance (either protein or location; likely in this case, a protein), is followed by the lemmas “localization” and “at”.                                  |
| <i>SOURCE</i> proliferation <i>TARGET</i> | Binary, Parsing Dependency (PD). Test if the source entity is connected to the second entity (target) by the lemma “proliferation” in the dependency parse tree.                                                               |
| in the <i>TARGET</i>                      | Binary, LD. Test if the lemmas “in” and “the” follow the target entity (likely a location).                                                                                                                                    |
| <i>SOURCE VERB DET</i>                    | Binary, LD. Test if the source entity is followed by two tokens, the first a VERB, the next a determiner (DET)                                                                                                                 |
| <i>VERB NOUN TARGET</i>                   | Binary, PD. Test if, in the dependency parse tree, a VERB token connects a NOUN token that connects the target entity.                                                                                                         |
| NSUBJ DOBJ PREP                           | Binary, PD. Test if, in the dependency parse tree, three tokens are connected with the dependencies NSUBJ (nominal subject) to (direct object) to PREP (prepositional modifier).                                               |

Table S2. Examples of novel GO annotations text-mined by *LocText*.

| Protein      | Localization                             | Text Source                                                                                                                                                                                                                                                                                                                                                                                                                                                                                                                                                                |
|--------------|------------------------------------------|----------------------------------------------------------------------------------------------------------------------------------------------------------------------------------------------------------------------------------------------------------------------------------------------------------------------------------------------------------------------------------------------------------------------------------------------------------------------------------------------------------------------------------------------------------------------------|
| P61586 human | GO:0005634 (nucleus)                     | Recent studies have revealed the localization of <b>RhoA</b> protein in the cell <b>nucleus</b> , in addition to its distribution in the cytosol and cell membrane. <i>PMID 26622605, 2015</i>                                                                                                                                                                                                                                                                                                                                                                             |
| P09936 human | GO:0008021 (synaptic vesicle)            | Both <b>synaptic vesicle markers</b> co-localized with the neuronal marker <b>PGP 9.5</b> and exhibited granular accumulation patterns in the <b>human</b> and rat ENS. <i>PMID 24025431, 2013</i>                                                                                                                                                                                                                                                                                                                                                                         |
| P56817 human | GO:0005764 (lysosome)                    | Here, we report that lack of ubiquitination at Lys-501 (BACE1K501R) does not affect the rate of endocytosis but produces <b>BACE1</b> stabilization and accumulation of <b>BACE1</b> in early and late endosomes/ <b>lysosomes</b> as well as at the cell membrane. <i>PMID 23109336, 2012</i>                                                                                                                                                                                                                                                                             |
| P01149 yeast | GO:0005773 (vacuole)                     | [...] we provided evidence for the existence of an endocytic intermediate(s) from the yeast <b>Saccharomyces cerevisiae</b> that is responsible for the transport of the <b>pheromone alpha-factor</b> from the plasma membrane to the <b>vacuole</b> . <i>PMID 8314797, 1993</i>                                                                                                                                                                                                                                                                                          |
| P13134 yeast | GO:0005768 (endosome)                    | However, <b>Kex2</b> localization is not static, and its itinerary apparently involves transiting out of the late Golgi and cycling back from post-Golgi <b>endosomal</b> compartments during its lifetime. We tested whether the endocytic pathway could deliver small molecules to <b>Kex2</b> from the extracellular medium. Here we report that intramolecularly quenched fluorogenic substrates taken up into intact <b>yeast</b> revealed fluorescence due to specific cleavage by <b>Kex2</b> protease in <b>endosomal</b> compartments. <i>PMID 10393104, 1999</i> |
| Q9FE59 cress | GO:0009705 (plant-type vacuole membrane) | We demonstrate that this motif can reroute other proteins, such as INT4, <b>SUCROSE TRANSPORTER2 (SUC2)</b> , or SWEET1, to the <b>tonoplast</b> and that the position of the motif relative to the transmembrane helix is critical. <i>PMID 22253225, 2012</i>                                                                                                                                                                                                                                                                                                            |
| O82533 cress | GO:0005829 (cytosol)                     | Here, we report the identification of a <b>second nuclear-encoded FtsZ-type protein</b> from <b>Arabidopsis</b> that does not contain a chloroplast targeting sequence or other obvious sorting signals and is not imported into isolated chloroplasts, which strongly suggests that it is localized in the <b>cytosol</b> . <i>PMID 9836740, 1998</i>                                                                                                                                                                                                                     |

Fig. S2. List of all finally selected features. Python-readable list of descriptive feature names.

```
[
  "SentenceFeatureGenerator::1.1_counts_individual_int_individual_e_1_[0]", # 0
  "SentenceFeatureGenerator::1.1_counts_individual_int_individual_e_3_[0]", # 1
  "SentenceFeatureGenerator::3_order_[0]", # 2
  "DependencyFeatureGenerator::19_LD_pos_N_gram_LD_1_<NOUN>_[0]", # 3
  "DependencyFeatureGenerator::19_LD_pos_N_gram_LD_2_<[SOURCE ~~ PUNCT>_[0]", # 4
  "DependencyFeatureGenerator::19_LD_pos_N_gram_LD_2_<PUNCT ~~ VERB>_[0]", # 5
  "DependencyFeatureGenerator::19_LD_pos_N_gram_LD_2_<NOUN ~~ NOUN>_[0]", # 6
  "DependencyFeatureGenerator::19_LD_pos_N_gram_LD_3_<VERB ~~ NOUN ~~ PUNCT>_[0]", # 7
  "DependencyFeatureGenerator::19_LD_pos_N_gram_LD_3_<NOUN ~~ PUNCT ~~ ADJ>_[0]", # 8
  "DependencyFeatureGenerator::19_LD_pos_N_gram_LD_3_<NOUN ~~ PUNCT ~~ NOUN>_[0]", # 9
  "DependencyFeatureGenerator::19_LD_pos_N_gram_LD_3_<PUNCT ~~ NOUN ~~ NOUN>_[0]", # 10
  "DependencyFeatureGenerator::18_LD_bow_N_gram_LD_1_<as>_[0]", # 11
  "DependencyFeatureGenerator::18_LD_bow_N_gram_LD_1_<an>_[0]", # 12
  "DependencyFeatureGenerator::19_LD_pos_N_gram_LD_1_<ADP>_[0]", # 13
  "DependencyFeatureGenerator::19_LD_pos_N_gram_LD_1_<NUM>_[0]", # 14
  "DependencyFeatureGenerator::19_LD_pos_N_gram_LD_1_<DET>_[0]", # 15
  "DependencyFeatureGenerator::19_LD_pos_N_gram_LD_2_<[SOURCE ~~ NOUN>_[0]", # 16
  "DependencyFeatureGenerator::19_LD_pos_N_gram_LD_2_<PUNCT ~~ DET>_[0]", # 17
  "DependencyFeatureGenerator::23_PD_pos_N_gram_PD_1_<VERB>_[0]", # 18
  "DependencyFeatureGenerator::23_PD_pos_N_gram_PD_1_<NOUN>_[0]", # 19
  "DependencyFeatureGenerator::26_PD_undirected_edges_N_gram_PD_1_<nsubj>_[0]", # 20
  "DependencyFeatureGenerator::26_PD_undirected_edges_N_gram_PD_1_<prep>_[0]", # 21
  "DependencyFeatureGenerator::23_PD_pos_N_gram_PD_2_<NOUN ~~ NOUN>_[0]", # 22
  "DependencyFeatureGenerator::23_PD_pos_N_gram_PD_3_<[SOURCE ~~ VERB ~~ ADP>_[0]", # 23
  "DependencyFeatureGenerator::23_PD_pos_N_gram_PD_3_<VERB ~~ ADP ~~ NOUN>_[0]", # 24
  "DependencyFeatureGenerator::23_PD_pos_N_gram_PD_3_<ADP ~~ NOUN ~~ NOUN>_[0]", # 25
  "DependencyFeatureGenerator::26_PD_undirected_edges_N_gram_PD_3_<prep ~~ pobj ~~ appos>_[0]", #
26
  "DependencyFeatureGenerator::19_LD_pos_N_gram_LD_1_<PROPN>_[0]", # 27
  "DependencyFeatureGenerator::18_LD_bow_N_gram_LD_2_<e_1 ~~ e_1>_[0]", # 28
  "DependencyFeatureGenerator::19_LD_pos_N_gram_LD_2_<DET ~~ ADJ>_[0]", # 29
  "DependencyFeatureGenerator::19_LD_pos_N_gram_LD_2_<NOUN ~~ PROPN>_[0]", # 30
  "DependencyFeatureGenerator::19_LD_pos_N_gram_LD_2_<PUNCT ~~ CONJ>_[0]", # 31
  "DependencyFeatureGenerator::19_LD_pos_N_gram_LD_3_<PUNCT ~~ CONJ ~~ DET>_[0]", # 32
  "DependencyFeatureGenerator::19_LD_pos_N_gram_LD_3_<CONJ ~~ DET ~~ TARGET>_[0]", # 33
  "DependencyFeatureGenerator::19_LD_pos_N_gram_LD_2_<[SOURCE ~~ VERB>_[0]", # 34
  "DependencyFeatureGenerator::19_LD_pos_N_gram_LD_3_<NOUN ~~ PUNCT ~~ TARGET>_[0]", # 35
  "DependencyFeatureGenerator::26_PD_undirected_edges_N_gram_PD_2_<amod ~~ appos>_[0]", # 36
  "DependencyFeatureGenerator::23_PD_pos_N_gram_PD_3_<[SOURCE ~~ NOUN ~~ TARGET>_[0]", # 37
  "DependencyFeatureGenerator::22_PD_bow_N_gram_PD_3_<[SOURCE ~~ form ~~ form>_[0]", # 38
  "DependencyFeatureGenerator::18_LD_bow_N_gram_LD_1_<, >_[0]", # 39
  "DependencyFeatureGenerator::18_LD_bow_N_gram_LD_2_<[SOURCE ~~ ,>_[0]", # 40
  "DependencyFeatureGenerator::18_LD_bow_N_gram_LD_2_<, ~~ TARGET>_[0]", # 41
  "DependencyFeatureGenerator::22_PD_bow_N_gram_PD_1_<to>_[0]", # 42
  "DependencyFeatureGenerator::22_PD_bow_N_gram_PD_1_<exit>_[0]", # 43
  "DependencyFeatureGenerator::26_PD_undirected_edges_N_gram_PD_1_<advcl>_[0]", # 44
  "DependencyFeatureGenerator::23_PD_pos_N_gram_PD_2_<VERB ~~ VERB>_[0]", # 45
  "DependencyFeatureGenerator::26_PD_undirected_edges_N_gram_PD_2_<pobj ~~ prep>_[0]", # 46
  "DependencyFeatureGenerator::26_PD_undirected_edges_N_gram_PD_2_<prep ~~ advcl>_[0]", # 47
  "DependencyFeatureGenerator::18_LD_bow_N_gram_LD_1_<in>_[0]", # 48
  "DependencyFeatureGenerator::19_LD_pos_N_gram_LD_2_<ADP ~~ NOUN>_[0]", # 49
  "DependencyFeatureGenerator::19_LD_pos_N_gram_LD_2_<ADP ~~ ADJ>_[0]", # 50
  "DependencyFeatureGenerator::19_LD_pos_N_gram_LD_3_<[SOURCE ~~ VERB ~~ VERB>_[0]", # 51
  "DependencyFeatureGenerator::19_LD_pos_N_gram_LD_3_<VERB ~~ VERB ~~ ADP>_[0]", # 52
  "DependencyFeatureGenerator::26_PD_undirected_edges_N_gram_PD_1_<dobj>_[0]", # 53
  "DependencyFeatureGenerator::26_PD_undirected_edges_N_gram_PD_2_<nsubj ~~ advcl>_[0]", # 54
  "DependencyFeatureGenerator::26_PD_undirected_edges_N_gram_PD_2_<dobj ~~ amod>_[0]", # 55
  "DependencyFeatureGenerator::23_PD_pos_N_gram_PD_3_<VERB ~~ NOUN ~~ TARGET>_[0]", # 56
  "DependencyFeatureGenerator::18_LD_bow_N_gram_LD_1_<mutant>_[0]", # 57
  "DependencyFeatureGenerator::19_LD_pos_N_gram_LD_1_<SYM>_[0]", # 58
  "DependencyFeatureGenerator::18_LD_bow_N_gram_LD_2_<, ~~ the>_[0]", # 59
  "DependencyFeatureGenerator::19_LD_pos_N_gram_LD_2_<DET ~~ PROPN>_[0]", # 60
  "DependencyFeatureGenerator::18_LD_bow_N_gram_LD_3_<the ~~ e_1 ~~ e_1>_[0]", # 61

```

"DependencyFeatureGenerator::22\_PD\_bow\_N\_gram\_PD\_1\_<accumulate>\_[0]", # 62  
 "DependencyFeatureGenerator::23\_PD\_pos\_N\_gram\_PD\_2\_<VERB ~ ADJ>\_[0]", # 63  
 "DependencyFeatureGenerator::23\_PD\_pos\_N\_gram\_PD\_2\_<ADP ~ TARGET>\_[0]", # 64  
 "DependencyFeatureGenerator::26\_PD\_undirected\_edges\_N\_gram\_PD\_2\_<acl ~ prep>\_[0]", # 65  
 "DependencyFeatureGenerator::23\_PD\_pos\_N\_gram\_PD\_3\_<[SOURCE ~ NOUN ~ ADP]>\_[0]", # 66  
 "DependencyFeatureGenerator::23\_PD\_pos\_N\_gram\_PD\_3\_<NOUN ~ ADP ~ NOUN>\_[0]", # 67  
 "DependencyFeatureGenerator::23\_PD\_pos\_N\_gram\_PD\_3\_<ADP ~ NOUN ~ ADP>\_[0]", # 68  
 "DependencyFeatureGenerator::23\_PD\_pos\_N\_gram\_PD\_3\_<NOUN ~ ADP ~ VERB>\_[0]", # 69  
 "DependencyFeatureGenerator::26\_PD\_undirected\_edges\_N\_gram\_PD\_3\_<pobj ~ prep ~ pobj>\_[0]", # 70  
 "DependencyFeatureGenerator::26\_PD\_undirected\_edges\_N\_gram\_PD\_3\_<acl ~ prep ~ pobj>\_[0]", # 71  
 "DependencyFeatureGenerator::18\_LD\_bow\_N\_gram\_LD\_1\_<cell>\_[0]", # 72  
 "DependencyFeatureGenerator::18\_LD\_bow\_N\_gram\_LD\_1\_<with>\_[0]", # 73  
 "DependencyFeatureGenerator::18\_LD\_bow\_N\_gram\_LD\_2\_<the ~ e\_2>\_[0]", # 74  
 "DependencyFeatureGenerator::18\_LD\_bow\_N\_gram\_LD\_2\_<e\_2 ~ of>\_[0]", # 75  
 "DependencyFeatureGenerator::18\_LD\_bow\_N\_gram\_LD\_2\_<e\_1 ~ and>\_[0]", # 76  
 "DependencyFeatureGenerator::18\_LD\_bow\_N\_gram\_LD\_2\_<with ~ the>\_[0]", # 77  
 "DependencyFeatureGenerator::19\_LD\_pos\_N\_gram\_LD\_3\_<NOUN ~ ADP ~ NOUN>\_[0]", # 78  
 "DependencyFeatureGenerator::19\_LD\_pos\_N\_gram\_LD\_3\_<ADP ~ NOUN ~ VERB>\_[0]", # 79  
 "DependencyFeatureGenerator::19\_LD\_pos\_N\_gram\_LD\_3\_<DET ~ PROPN ~ NOUN>\_[0]", # 80  
 "DependencyFeatureGenerator::19\_LD\_pos\_N\_gram\_LD\_3\_<NOUN ~ ADP ~ DET>\_[0]", # 81  
 "DependencyFeatureGenerator::26\_PD\_undirected\_edges\_N\_gram\_PD\_1\_<nsubjpass>\_[0]", # 82  
 "DependencyFeatureGenerator::19\_LD\_pos\_N\_gram\_LD\_3\_<VERB ~ DET ~ TARGET>\_[0]", # 83  
 "DependencyFeatureGenerator::22\_PD\_bow\_N\_gram\_PD\_1\_<of>\_[0]", # 84  
 "DependencyFeatureGenerator::22\_PD\_bow\_N\_gram\_PD\_1\_<cell>\_[0]", # 85  
 "DependencyFeatureGenerator::22\_PD\_bow\_N\_gram\_PD\_2\_<[SOURCE ~ of>\_[0]", # 86  
 "DependencyFeatureGenerator::23\_PD\_pos\_N\_gram\_PD\_2\_<NOUN ~ VERB>\_[0]", # 87  
 "DependencyFeatureGenerator::26\_PD\_undirected\_edges\_N\_gram\_PD\_3\_<prep ~ pobj ~ acl>\_[0]", # 88  
 "DependencyFeatureGenerator::26\_PD\_undirected\_edges\_N\_gram\_PD\_2\_<dobj ~ acl>\_[0]", # 89  
 "DependencyFeatureGenerator::26\_PD\_undirected\_edges\_N\_gram\_PD\_2\_<acl ~ pobj>\_[0]", # 90  
 "DependencyFeatureGenerator::26\_PD\_undirected\_edges\_N\_gram\_PD\_2\_<amod ~ prep>\_[0]", # 91  
 "DependencyFeatureGenerator::26\_PD\_undirected\_edges\_N\_gram\_PD\_3\_<amod ~ prep ~ pobj>\_[0]", # 92  
 "DependencyFeatureGenerator::22\_PD\_bow\_N\_gram\_PD\_2\_<[SOURCE ~ in>\_[0]", # 93  
 "DependencyFeatureGenerator::26\_PD\_undirected\_edges\_N\_gram\_PD\_2\_<pobj ~ compound>\_[0]", # 94  
 "DependencyFeatureGenerator::18\_LD\_bow\_N\_gram\_LD\_1\_<be>\_[0]", # 95  
 "DependencyFeatureGenerator::18\_LD\_bow\_N\_gram\_LD\_1\_<class>\_[0]", # 96  
 "DependencyFeatureGenerator::18\_LD\_bow\_N\_gram\_LD\_1\_<relate>\_[0]", # 97  
 "DependencyFeatureGenerator::18\_LD\_bow\_N\_gram\_LD\_2\_<on ~ TARGET>\_[0]", # 98  
 "DependencyFeatureGenerator::19\_LD\_pos\_N\_gram\_LD\_2\_<ADP ~ TARGET>\_[0]", # 99  
 "DependencyFeatureGenerator::19\_LD\_pos\_N\_gram\_LD\_3\_<[SOURCE ~ VERB ~ DET>\_[0]", # 100  
 "DependencyFeatureGenerator::22\_PD\_bow\_N\_gram\_PD\_1\_<be>\_[0]", # 101  
 "DependencyFeatureGenerator::23\_PD\_pos\_N\_gram\_PD\_3\_<NOUN ~ NOUN ~ VERB>\_[0]", # 102  
 "DependencyFeatureGenerator::19\_LD\_pos\_N\_gram\_LD\_2\_<NOUN ~ CONJ>\_[0]", # 103  
 "DependencyFeatureGenerator::19\_LD\_pos\_N\_gram\_LD\_2\_<CONJ ~ VERB>\_[0]", # 104  
 "DependencyFeatureGenerator::19\_LD\_pos\_N\_gram\_LD\_3\_<DET ~ NOUN ~ PUNCT>\_[0]", # 105  
 "DependencyFeatureGenerator::19\_LD\_pos\_N\_gram\_LD\_3\_<CONJ ~ VERB ~ VERB>\_[0]", # 106  
 "DependencyFeatureGenerator::19\_LD\_pos\_N\_gram\_LD\_3\_<VERB ~ ADP ~ ADJ>\_[0]", # 107  
 "DependencyFeatureGenerator::26\_PD\_undirected\_edges\_N\_gram\_PD\_1\_<nummod>\_[0]", # 108  
 "DependencyFeatureGenerator::23\_PD\_pos\_N\_gram\_PD\_3\_<VERB ~ VERB ~ ADP>\_[0]", # 109  
 "DependencyFeatureGenerator::18\_LD\_bow\_N\_gram\_LD\_1\_<expression>\_[0]", # 110  
 "DependencyFeatureGenerator::19\_LD\_pos\_N\_gram\_LD\_3\_<NOUN ~ ADP ~ TARGET>\_[0]", # 111  
 "DependencyFeatureGenerator::18\_LD\_bow\_N\_gram\_LD\_2\_<) ~ be>\_[0]", # 112  
 "DependencyFeatureGenerator::19\_LD\_pos\_N\_gram\_LD\_2\_<PROP N ~ PUNCT>\_[0]", # 113  
 "DependencyFeatureGenerator::19\_LD\_pos\_N\_gram\_LD\_3\_<VERB ~ ADJ ~ NOUN>\_[0]", # 114  
 "DependencyFeatureGenerator::19\_LD\_pos\_N\_gram\_LD\_3\_<NOUN ~ ADP ~ VERB>\_[0]", # 115  
 "DependencyFeatureGenerator::22\_PD\_bow\_N\_gram\_PD\_1\_<from>\_[0]", # 116  
 "DependencyFeatureGenerator::26\_PD\_undirected\_edges\_N\_gram\_PD\_1\_<acomp>\_[0]", # 117  
 "DependencyFeatureGenerator::26\_PD\_undirected\_edges\_N\_gram\_PD\_1\_<advmod>\_[0]", # 118  
 "DependencyFeatureGenerator::26\_PD\_undirected\_edges\_N\_gram\_PD\_2\_<pcomp ~ prep>\_[0]", # 119  
 "DependencyFeatureGenerator::26\_PD\_undirected\_edges\_N\_gram\_PD\_3\_<nsubj ~ acomp ~ prep>\_[0]", # 120  
 "DependencyFeatureGenerator::18\_LD\_bow\_N\_gram\_LD\_2\_<with ~ e\_1>\_[0]", # 121  
 "DependencyFeatureGenerator::19\_LD\_pos\_N\_gram\_LD\_2\_<ADP ~ PROP N>\_[0]", # 122  
 "DependencyFeatureGenerator::19\_LD\_pos\_N\_gram\_LD\_2\_<PROP N ~ ADP>\_[0]", # 123  
 "DependencyFeatureGenerator::19\_LD\_pos\_N\_gram\_LD\_2\_<VERB ~ PROP N>\_[0]", # 124

**LocText: relation extraction of protein localizations to assist database curation**

"DependencyFeatureGenerator::18\_LD\_bow\_N\_gram\_LD\_3\_{SOURCE ~ colocalizes ~ with}>\_0]", # 125  
"DependencyFeatureGenerator::19\_LD\_pos\_N\_gram\_LD\_3\_{NUM ~ ADP ~ DET}>\_0]", # 126  
"DependencyFeatureGenerator::19\_LD\_pos\_N\_gram\_LD\_3\_{DET ~ NOUN ~ TARGET}>\_0]", # 127  
"DependencyFeatureGenerator::18\_LD\_bow\_N\_gram\_LD\_3\_{SOURCE ~ and ~ e\_1}>\_0]", # 128  
"DependencyFeatureGenerator::23\_PD\_pos\_N\_gram\_PD\_2\_{SOURCE ~ PROPN}>\_0]", # 129  
"DependencyFeatureGenerator::26\_PD\_undirected\_edges\_N\_gram\_PD\_2\_{conj ~ pobj}>\_0]", # 130  
"DependencyFeatureGenerator::26\_PD\_undirected\_edges\_N\_gram\_PD\_2\_{conj ~ conj}>\_0]", # 131  
"DependencyFeatureGenerator::18\_LD\_bow\_N\_gram\_LD\_2\_{SOURCE ~ in}>\_0]", # 132  
"DependencyFeatureGenerator::19\_LD\_pos\_N\_gram\_LD\_3\_{SOURCE ~ NOUN ~ TARGET}>\_0]", # 133  
"DependencyFeatureGenerator::18\_LD\_bow\_N\_gram\_LD\_1\_{transporter}>\_0]", # 134  
"DependencyFeatureGenerator::18\_LD\_bow\_N\_gram\_LD\_1\_{that}>\_0]", # 135  
"DependencyFeatureGenerator::18\_LD\_bow\_N\_gram\_LD\_2\_{e\_1 ~ ,}>\_0]", # 136  
"DependencyFeatureGenerator::19\_LD\_pos\_N\_gram\_LD\_2\_{ADV ~ VERB}>\_0]", # 137  
"DependencyFeatureGenerator::18\_LD\_bow\_N\_gram\_LD\_3\_{e\_1 ~ e\_1 ~ ,}>\_0]", # 138  
"DependencyFeatureGenerator::18\_LD\_bow\_N\_gram\_LD\_3\_{e\_1 ~ ( ~ e\_1}>\_0]", # 139  
"DependencyFeatureGenerator::19\_LD\_pos\_N\_gram\_LD\_3\_{NOUN ~ NOUN ~ NUM}>\_0]", # 140  
"DependencyFeatureGenerator::19\_LD\_pos\_N\_gram\_LD\_3\_{VERB ~ ADV ~ VERB}>\_0]", # 141  
"DependencyFeatureGenerator::23\_PD\_pos\_N\_gram\_PD\_2\_{NOUN ~ PROPN}>\_0]", # 142  
"DependencyFeatureGenerator::26\_PD\_undirected\_edges\_N\_gram\_PD\_2\_{appos ~ appos}>\_0]", # 143  
"DependencyFeatureGenerator::19\_LD\_pos\_N\_gram\_LD\_3\_{SOURCE ~ PUNCT ~ NOUN}>\_0]", # 144  
"DependencyFeatureGenerator::18\_LD\_bow\_N\_gram\_LD\_1\_{both}>\_0]", # 145  
"DependencyFeatureGenerator::18\_LD\_bow\_N\_gram\_LD\_1\_{e\_3}>\_0]", # 146  
"DependencyFeatureGenerator::18\_LD\_bow\_N\_gram\_LD\_2\_{localize ~ to}>\_0]", # 147  
"DependencyFeatureGenerator::18\_LD\_bow\_N\_gram\_LD\_2\_{of ~ e\_3}>\_0]", # 148  
"DependencyFeatureGenerator::19\_LD\_pos\_N\_gram\_LD\_2\_{PUNCT ~ ADP}>\_0]", # 149  
"DependencyFeatureGenerator::19\_LD\_pos\_N\_gram\_LD\_3\_{ADP ~ PROPN ~ NUM}>\_0]", # 150  
"DependencyFeatureGenerator::26\_PD\_undirected\_edges\_N\_gram\_PD\_2\_{pobj ~ amod}>\_0]", # 151  
"DependencyFeatureGenerator::26\_PD\_undirected\_edges\_N\_gram\_PD\_3\_{prep ~ pobj ~ amod}>\_0]", # 152  
"DependencyFeatureGenerator::19\_LD\_pos\_N\_gram\_LD\_3\_{DET ~ NOUN ~ PART}>\_0]", # 153  
"DependencyFeatureGenerator::26\_PD\_undirected\_edges\_N\_gram\_PD\_2\_{prep ~ nsubj}>\_0]", # 154  
"DependencyFeatureGenerator::26\_PD\_undirected\_edges\_N\_gram\_PD\_2\_{ccomp ~ dobj}>\_0]", # 155  
"DependencyFeatureGenerator::26\_PD\_undirected\_edges\_N\_gram\_PD\_3\_{pobj ~ prep ~ nsubj}>\_0]", # 156  
"DependencyFeatureGenerator::18\_LD\_bow\_N\_gram\_LD\_2\_{with ~ TARGET}>\_0]", # 157  
"DependencyFeatureGenerator::26\_PD\_undirected\_edges\_N\_gram\_PD\_1\_{nmod}>\_0]", # 158  
"DependencyFeatureGenerator::26\_PD\_undirected\_edges\_N\_gram\_PD\_1\_{agent}>\_0]", # 159  
"DependencyFeatureGenerator::23\_PD\_pos\_N\_gram\_PD\_2\_{ADV ~ VERB}>\_0]", # 160  
"DependencyFeatureGenerator::18\_LD\_bow\_N\_gram\_LD\_2\_{of ~ a}>\_0]", # 161  
"DependencyFeatureGenerator::19\_LD\_pos\_N\_gram\_LD\_2\_{PROPN ~ VERB}>\_0]", # 162  
"DependencyFeatureGenerator::22\_PD\_bow\_N\_gram\_PD\_2\_{involve ~ in}>\_0]", # 163  
"DependencyFeatureGenerator::18\_LD\_bow\_N\_gram\_LD\_1\_{protein}>\_0]", # 164  
"DependencyFeatureGenerator::19\_LD\_pos\_N\_gram\_LD\_3\_{VERB ~ NOUN ~ ADP}>\_0]", # 165  
"DependencyFeatureGenerator::22\_PD\_bow\_N\_gram\_PD\_1\_{protein}>\_0]", # 166  
"DependencyFeatureGenerator::22\_PD\_bow\_N\_gram\_PD\_2\_{of ~ activity}>\_0]", # 167  
"DependencyFeatureGenerator::18\_LD\_bow\_N\_gram\_LD\_2\_{and ~ the}>\_0]", # 168  
"DependencyFeatureGenerator::19\_LD\_pos\_N\_gram\_LD\_3\_{NOUN ~ PUNCT ~ CONJ}>\_0]", # 169  
"DependencyFeatureGenerator::19\_LD\_pos\_N\_gram\_LD\_3\_{DET ~ NOUN ~ NOUN}>\_0]", # 170  
"DependencyFeatureGenerator::22\_PD\_bow\_N\_gram\_PD\_2\_{SOURCE ~ protein}>\_0]", # 171  
"DependencyFeatureGenerator::19\_LD\_pos\_N\_gram\_LD\_3\_{DET ~ VERB ~ NOUN}>\_0]", # 172  
"DependencyFeatureGenerator::26\_PD\_undirected\_edges\_N\_gram\_PD\_2\_{conj ~ nsubj}>\_0]", # 173  
"DependencyFeatureGenerator::18\_LD\_bow\_N\_gram\_LD\_2\_{e\_3 ~ TARGET}>\_0]", # 174  
"DependencyFeatureGenerator::26\_PD\_undirected\_edges\_N\_gram\_PD\_2\_{nsubj ~ dobj}>\_0]", # 175  
"DependencyFeatureGenerator::19\_LD\_pos\_N\_gram\_LD\_3\_{PUNCT ~ ADP ~ NOUN}>\_0]", # 176  
"DependencyFeatureGenerator::22\_PD\_bow\_N\_gram\_PD\_1\_{tag}>\_0]", # 177  
"DependencyFeatureGenerator::26\_PD\_undirected\_edges\_N\_gram\_PD\_2\_{advmod ~ dobj}>\_0]", # 178  
"DependencyFeatureGenerator::26\_PD\_undirected\_edges\_N\_gram\_PD\_3\_{advmod ~ dobj ~ compound}>\_0]", # 179  
"DependencyFeatureGenerator::18\_LD\_bow\_N\_gram\_LD\_1\_{gene}>\_0]", # 180  
"DependencyFeatureGenerator::22\_PD\_bow\_N\_gram\_PD\_2\_{SOURCE ~ by}>\_0]", # 181  
"DependencyFeatureGenerator::19\_LD\_pos\_N\_gram\_LD\_3\_{NOUN ~ NOUN ~ PROPN}>\_0]", # 182  
"DependencyFeatureGenerator::19\_LD\_pos\_N\_gram\_LD\_3\_{NOUN ~ PROPN ~ PROPN}>\_0]", # 183  
"DependencyFeatureGenerator::22\_PD\_bow\_N\_gram\_PD\_1\_{activate}>\_0]", # 184  
"DependencyFeatureGenerator::18\_LD\_bow\_N\_gram\_LD\_1\_{require}>\_0]", # 185  
"DependencyFeatureGenerator::18\_LD\_bow\_N\_gram\_LD\_1\_{biogenesis}>\_0]", # 186  
"DependencyFeatureGenerator::18\_LD\_bow\_N\_gram\_LD\_1\_{modulates}>\_0]", # 187

"DependencyFeatureGenerator::18\_LD\_bow\_N\_gram\_LD\_1\_<glycosylation>\_[0]", # 188  
"DependencyFeatureGenerator::19\_LD\_pos\_N\_gram\_LD\_3\_<NOUN ~ ADJ ~ NOUN>\_[0]", # 189  
"DependencyFeatureGenerator::22\_PD\_bow\_N\_gram\_PD\_2\_<expression ~ TARGET>\_[0]", # 190  
"DependencyFeatureGenerator::18\_LD\_bow\_N\_gram\_LD\_2\_<and ~ TARGET>\_[0]", # 191  
"DependencyFeatureGenerator::19\_LD\_pos\_N\_gram\_LD\_3\_<PUNCT ~ CONJ ~ TARGET>\_[0]", # 192  
"DependencyFeatureGenerator::23\_PD\_pos\_N\_gram\_PD\_3\_<NOUN ~ NOUN ~ ADP>\_[0]", # 193  
"DependencyFeatureGenerator::19\_LD\_pos\_N\_gram\_LD\_2\_<DET ~ ADV>\_[0]", # 194  
"DependencyFeatureGenerator::19\_LD\_pos\_N\_gram\_LD\_3\_<VERB ~ VERB ~ PART>\_[0]", # 195  
"DependencyFeatureGenerator::22\_PD\_bow\_N\_gram\_PD\_2\_<be ~ protein>\_[0]", # 196  
"DependencyFeatureGenerator::18\_LD\_bow\_N\_gram\_LD\_1\_<induce>\_[0]", # 197  
"DependencyFeatureGenerator::18\_LD\_bow\_N\_gram\_LD\_2\_<e\_2 ~ and>\_[0]", # 198  
"DependencyFeatureGenerator::18\_LD\_bow\_N\_gram\_LD\_2\_<and ~ inhibit>\_[0]", # 199  
"DependencyFeatureGenerator::22\_PD\_bow\_N\_gram\_PD\_2\_<retention ~ inhibit>\_[0]", # 200  
"DependencyFeatureGenerator::23\_PD\_pos\_N\_gram\_PD\_3\_<ADP ~ ADP ~ TARGET>\_[0]", # 201  
"DependencyFeatureGenerator::26\_PD\_undirected\_edges\_N\_gram\_PD\_3\_<nsubj ~ dobj ~ compound>\_[0]", # 202  
"DependencyFeatureGenerator::26\_PD\_undirected\_edges\_N\_gram\_PD\_2\_<compound ~ conj>\_[0]", # 203  
"DependencyFeatureGenerator::26\_PD\_undirected\_edges\_N\_gram\_PD\_2\_<dobj ~ advcl>\_[0]", # 204  
"DependencyFeatureGenerator::26\_PD\_undirected\_edges\_N\_gram\_PD\_3\_<pobj ~ prep ~ dobj>\_[0]", # 205  
"DependencyFeatureGenerator::22\_PD\_bow\_N\_gram\_PD\_2\_<function ~ TARGET>\_[0]", # 206  
"DependencyFeatureGenerator::19\_LD\_pos\_N\_gram\_LD\_3\_<VERB ~ ADJ ~ TARGET>\_[0]", # 207  
"DependencyFeatureGenerator::26\_PD\_undirected\_edges\_N\_gram\_PD\_2\_<nmod ~ pobj>\_[0]", # 208  
"DependencyFeatureGenerator::23\_PD\_pos\_N\_gram\_PD\_3\_<ADP ~ PROPN ~ TARGET>\_[0]", # 209  
"DependencyFeatureGenerator::18\_LD\_bow\_N\_gram\_LD\_3\_<[SOURCE ~ be ~ require>\_[0]", # 210  
"DependencyFeatureGenerator::19\_LD\_pos\_N\_gram\_LD\_3\_<PUNCT ~ ADV ~ PUNCT>\_[0]", # 211  
"DependencyFeatureGenerator::18\_LD\_bow\_N\_gram\_LD\_1\_<function>\_[0]", # 212  
"DependencyFeatureGenerator::18\_LD\_bow\_N\_gram\_LD\_2\_<of ~ e\_1>\_[0]", # 213  
"DependencyFeatureGenerator::18\_LD\_bow\_N\_gram\_LD\_3\_<- ~ independent ~ function>\_[0]", # 214  
"DependencyFeatureGenerator::22\_PD\_bow\_N\_gram\_PD\_3\_<[SOURCE ~ function ~ require>\_[0]", # 215  
"DependencyFeatureGenerator::22\_PD\_bow\_N\_gram\_PD\_2\_<of ~ function>\_[0]", # 216  
"DependencyFeatureGenerator::22\_PD\_bow\_N\_gram\_PD\_3\_<[SOURCE ~ of ~ function>\_[0]", # 217  
"DependencyFeatureGenerator::26\_PD\_undirected\_edges\_N\_gram\_PD\_3\_<pobj ~ prep ~ nsubjpass>\_[0]", # 218  
"DependencyFeatureGenerator::26\_PD\_undirected\_edges\_N\_gram\_PD\_2\_<pobj ~ nmod>\_[0]", # 219  
"DependencyFeatureGenerator::26\_PD\_undirected\_edges\_N\_gram\_PD\_3\_<prep ~ pobj ~ nmod>\_[0]", # 220  
"DependencyFeatureGenerator::19\_LD\_pos\_N\_gram\_LD\_3\_<PUNCT ~ ADP ~ VERB>\_[0]", # 221  
"DependencyFeatureGenerator::18\_LD\_bow\_N\_gram\_LD\_1\_<signal>\_[0]", # 222  
"DependencyFeatureGenerator::22\_PD\_bow\_N\_gram\_PD\_2\_<[SOURCE ~ signal>\_[0]", # 223  
"DependencyFeatureGenerator::26\_PD\_undirected\_edges\_N\_gram\_PD\_2\_<amod ~ nsubj>\_[0]", # 224  
"DependencyFeatureGenerator::22\_PD\_bow\_N\_gram\_PD\_1\_<show>\_[0]", # 225  
"DependencyFeatureGenerator::26\_PD\_undirected\_edges\_N\_gram\_PD\_2\_<dobj ~ ccomp>\_[0]", # 226  
"DependencyFeatureGenerator::18\_LD\_bow\_N\_gram\_LD\_1\_<ubiquitination>\_[0]", # 227  
"DependencyFeatureGenerator::22\_PD\_bow\_N\_gram\_PD\_1\_<ubiquitination>\_[0]", # 228  
"DependencyFeatureGenerator::23\_PD\_pos\_N\_gram\_PD\_3\_<[SOURCE ~ ADP ~ TARGET>\_[0]", # 229  
"DependencyFeatureGenerator::18\_LD\_bow\_N\_gram\_LD\_1\_<activation>\_[0]", # 230  
"DependencyFeatureGenerator::19\_LD\_pos\_N\_gram\_LD\_3\_<NOUN ~ VERB ~ PROPN>\_[0]", # 231  
"DependencyFeatureGenerator::19\_LD\_pos\_N\_gram\_LD\_3\_<NUM ~ NOUN ~ ADP>\_[0]", # 232  
"DependencyFeatureGenerator::22\_PD\_bow\_N\_gram\_PD\_1\_<region>\_[0]", # 233  
"DependencyFeatureGenerator::19\_LD\_pos\_N\_gram\_LD\_3\_<ADJ ~ ADP ~ PROPN>\_[0]", # 234  
"DependencyFeatureGenerator::26\_PD\_undirected\_edges\_N\_gram\_PD\_3\_<nsubj ~ advcl ~ nsubjpass>\_[0]", # 235  
"DependencyFeatureGenerator::18\_LD\_bow\_N\_gram\_LD\_3\_<e\_1 ~ , ~ the>\_[0]", # 236  
"DependencyFeatureGenerator::26\_PD\_undirected\_edges\_N\_gram\_PD\_2\_<advcl ~ prep>\_[0]", # 237  
"DependencyFeatureGenerator::18\_LD\_bow\_N\_gram\_LD\_2\_<[SOURCE ~ from>\_[0]", # 238  
"DependencyFeatureGenerator::22\_PD\_bow\_N\_gram\_PD\_2\_<into ~ TARGET>\_[0]", # 239  
"DependencyFeatureGenerator::19\_LD\_pos\_N\_gram\_LD\_3\_<ADP ~ ADJ ~ TARGET>\_[0]", # 240  
"DependencyFeatureGenerator::19\_LD\_pos\_N\_gram\_LD\_2\_<ADV ~ TARGET>\_[0]", # 241  
"DependencyFeatureGenerator::18\_LD\_bow\_N\_gram\_LD\_1\_<this>\_[0]", # 242  
"DependencyFeatureGenerator::19\_LD\_pos\_N\_gram\_LD\_3\_<DET ~ ADJ ~ ADJ>\_[0]", # 243  
"DependencyFeatureGenerator::19\_LD\_pos\_N\_gram\_LD\_3\_<ADP ~ PROPN ~ PUNCT>\_[0]", # 244  
"DependencyFeatureGenerator::18\_LD\_bow\_N\_gram\_LD\_1\_<compromise>\_[0]", # 245  
"DependencyFeatureGenerator::22\_PD\_bow\_N\_gram\_PD\_1\_<fuse>\_[0]", # 246  
"DependencyFeatureGenerator::26\_PD\_undirected\_edges\_N\_gram\_PD\_2\_<acl ~ acomp>\_[0]", # 247  
"DependencyFeatureGenerator::19\_LD\_pos\_N\_gram\_LD\_3\_<NOUN ~ PUNCT ~ PUNCT>\_[0]", # 248



**LocText: relation extraction of protein localizations to assist database curation**

"DependencyFeatureGenerator::18\_LD\_bow\_N\_gram\_LD\_1\_<vesicle>\_[0]", # 249  
"DependencyFeatureGenerator::18\_LD\_bow\_N\_gram\_LD\_1\_<dispensable>\_[0]", # 250  
"DependencyFeatureGenerator::18\_LD\_bow\_N\_gram\_LD\_2\_<be ~ dispensable>\_[0]", # 251  
"DependencyFeatureGenerator::22\_PD\_bow\_N\_gram\_PD\_2\_<dispensable ~ for>\_[0]", # 252  
"DependencyFeatureGenerator::22\_PD\_bow\_N\_gram\_PD\_3\_<be ~ dispensable ~ for>\_[0]", # 253  
"DependencyFeatureGenerator::18\_LD\_bow\_N\_gram\_LD\_2\_<e\_1 ~ to>\_[0]", # 254  
"DependencyFeatureGenerator::18\_LD\_bow\_N\_gram\_LD\_1\_<location>\_[0]", # 255  
"DependencyFeatureGenerator::18\_LD\_bow\_N\_gram\_LD\_2\_<[SOURCE ~ location]>\_[0]", # 256  
"DependencyFeatureGenerator::22\_PD\_bow\_N\_gram\_PD\_2\_<[SOURCE ~ location]>\_[0]", # 257  
"DependencyFeatureGenerator::18\_LD\_bow\_N\_gram\_LD\_2\_<, ~ to>\_[0]", # 258  
"DependencyFeatureGenerator::18\_LD\_bow\_N\_gram\_LD\_2\_<, ~ while>\_[0]", # 259  
"DependencyFeatureGenerator::26\_PD\_undirected\_edges\_N\_gram\_PD\_2\_<appos ~ compound>\_[0]", # 260  
"DependencyFeatureGenerator::19\_LD\_pos\_N\_gram\_LD\_3\_<PUNCT ~ VERB ~ TARGET>\_[0]", # 261  
"DependencyFeatureGenerator::18\_LD\_bow\_N\_gram\_LD\_1\_<important>\_[0]", # 262  
"DependencyFeatureGenerator::22\_PD\_bow\_N\_gram\_PD\_1\_<morphology>\_[0]", # 263  
"DependencyFeatureGenerator::26\_PD\_undirected\_edges\_N\_gram\_PD\_3\_<pobj ~ amod ~ npadvmod>\_[0]", # 264  
"DependencyFeatureGenerator::18\_LD\_bow\_N\_gram\_LD\_1\_<defect>\_[0]", # 265  
"DependencyFeatureGenerator::18\_LD\_bow\_N\_gram\_LD\_1\_<cohesin>\_[0]", # 266  
"DependencyFeatureGenerator::18\_LD\_bow\_N\_gram\_LD\_1\_<assembly>\_[0]", # 267  
"DependencyFeatureGenerator::22\_PD\_bow\_N\_gram\_PD\_3\_<[SOURCE ~ determine ~ localize>\_[0]", # 268  
"DependencyFeatureGenerator::18\_LD\_bow\_N\_gram\_LD\_2\_<[SOURCE ~ TARGET]>\_[0]", # 269  
"DependencyFeatureGenerator::18\_LD\_bow\_N\_gram\_LD\_1\_<significantly>\_[0]", # 270  
"DependencyFeatureGenerator::18\_LD\_bow\_N\_gram\_LD\_2\_<be ~ significantly>\_[0]", # 271  
"DependencyFeatureGenerator::22\_PD\_bow\_N\_gram\_PD\_2\_<at ~ have>\_[0]", # 272  
"DependencyFeatureGenerator::22\_PD\_bow\_N\_gram\_PD\_3\_<[SOURCE ~ at ~ have>\_[0]", # 273  
"DependencyFeatureGenerator::22\_PD\_bow\_N\_gram\_PD\_3\_<[SOURCE ~ recruitment ~ of>\_[0]", # 274  
"DependencyFeatureGenerator::26\_PD\_undirected\_edges\_N\_gram\_PD\_3\_<prep ~ nsubj ~ prep>\_[0]", # 275  
"DependencyFeatureGenerator::18\_LD\_bow\_N\_gram\_LD\_3\_<[SOURCE ~ domain ~ of>\_[0]", # 276  
"DependencyFeatureGenerator::22\_PD\_bow\_N\_gram\_PD\_3\_<[SOURCE ~ domain ~ of>\_[0]", # 277  
"DependencyFeatureGenerator::22\_PD\_bow\_N\_gram\_PD\_1\_<reconfiguring>\_[0]", # 278  
"DependencyFeatureGenerator::22\_PD\_bow\_N\_gram\_PD\_2\_<division ~ TARGET>\_[0]", # 279  
"DependencyFeatureGenerator::22\_PD\_bow\_N\_gram\_PD\_2\_<abundance ~ TARGET>\_[0]", # 280  
"DependencyFeatureGenerator::18\_LD\_bow\_N\_gram\_LD\_1\_<eliminate>\_[0]", # 281  
"DependencyFeatureGenerator::22\_PD\_bow\_N\_gram\_PD\_2\_<from ~ through>\_[0]", # 282  
"DependencyFeatureGenerator::22\_PD\_bow\_N\_gram\_PD\_3\_<from ~ through ~ TARGET>\_[0]", # 283  
"DependencyFeatureGenerator::18\_LD\_bow\_N\_gram\_LD\_1\_<stress>\_[0]", # 284  
"DependencyFeatureGenerator::18\_LD\_bow\_N\_gram\_LD\_2\_<[SOURCE ~ stress>\_[0]", # 285  
"DependencyFeatureGenerator::22\_PD\_bow\_N\_gram\_PD\_1\_<stress>\_[0]", # 286  
"DependencyFeatureGenerator::26\_PD\_undirected\_edges\_N\_gram\_PD\_3\_<appos ~ nsubj ~ dobj>\_[0]", # 287  
"DependencyFeatureGenerator::22\_PD\_bow\_N\_gram\_PD\_3\_<localization ~ disrupt ~ by>\_[0]", # 288  
"DependencyFeatureGenerator::18\_LD\_bow\_N\_gram\_LD\_3\_<e\_1 ~ to ~ TARGET>\_[0]", # 289  
"DependencyFeatureGenerator::18\_LD\_bow\_N\_gram\_LD\_2\_<that ~ u>\_[0]", # 290  
"DependencyFeatureGenerator::18\_LD\_bow\_N\_gram\_LD\_2\_<require ~ e\_1>\_[0]", # 291  
"DependencyFeatureGenerator::19\_LD\_pos\_N\_gram\_LD\_2\_<PRON ~ NUM>\_[0]", # 292  
"DependencyFeatureGenerator::18\_LD\_bow\_N\_gram\_LD\_3\_<show ~ that ~ u>\_[0]", # 293  
"DependencyFeatureGenerator::18\_LD\_bow\_N\_gram\_LD\_3\_<first ~ require ~ e\_1>\_[0]", # 294  
"DependencyFeatureGenerator::19\_LD\_pos\_N\_gram\_LD\_3\_<ADP ~ PRON ~ NUM>\_[0]", # 295  
"DependencyFeatureGenerator::19\_LD\_pos\_N\_gram\_LD\_3\_<NUM ~ ADV ~ VERB>\_[0]", # 296  
"DependencyFeatureGenerator::22\_PD\_bow\_N\_gram\_PD\_2\_<show ~ require>\_[0]", # 297  
"DependencyFeatureGenerator::18\_LD\_bow\_N\_gram\_LD\_3\_<[SOURCE ~ to ~ mediate>\_[0]", # 298  
"IsSpecificProteinType::40\_is\_marker\_[0]", # 299  
"LocalizationRelationsRatios::50\_corpus\_unnormalized\_total\_background\_loc\_rels\_ratios\_[0]", # 300  
"LocalizationRelationsRatios::58\_SwissProt\_normalized\_exists\_relation\_[0]", # 301

]

**Fig. S3. PR-curve analysis.** *LocText* vs. *Baseline*, using manually-annotated entities. The maximum recall for both methods is 74%. The *Baseline* is shown as a single point (no decision value). A two-sample two-tailed t-test was performed to determine whether the methods' difference in F-Measure,  $F(\text{LocText})=79\% \pm 3$  vs.  $F(\text{Baseline})=74\% \pm 3$ , was significant. The t-statistic was significant at the 99% confidence level,  $t(3998)=28.04$ ,  $p=3.99e-165$ .

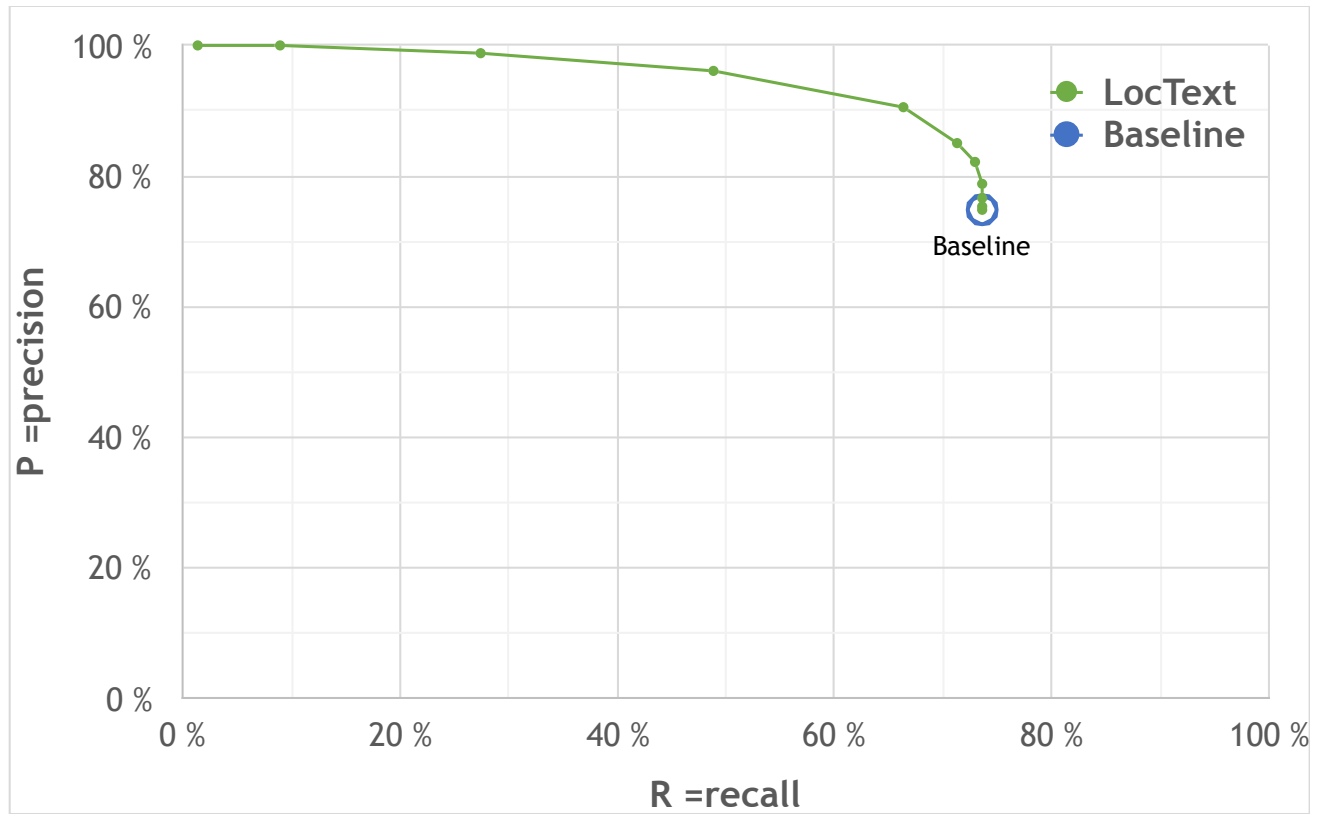

Supplement: 12859_2018_2021_MOESM1_ESM.pdf [file 12859_2018_2021_MOESM1_ESM.pdf]
